# Supplementary material
Source: PubMed Central journal article supplement (PMC11029782)
Supplement: 262_2013_1505_MOESM1_ESM.pdf [file 262_2013_1505_MOESM1_ESM.pdf]

**Phase I Trial of a recombinant yeast-CEA vaccine (GI-6207)  
in adults with metastatic CEA-expressing carcinoma**

**Supplemental Table 1. Patient characteristics and dose assignments**

|                                                                  |                        |
|------------------------------------------------------------------|------------------------|
| <b>Gender</b>                                                    |                        |
| Male                                                             | 10                     |
| Female                                                           | 15                     |
| <b>Median age (range)</b>                                        | 52 (39–81)             |
| <b>Tumor types</b>                                               |                        |
| Colon cancer                                                     | 20                     |
| Rectal cancer                                                    | 2                      |
| Medullary thyroid, non-small cell lung,<br>and pancreatic cancer | 1 each                 |
| <b>Median previous chemotherapy regimens</b>                     | 4 (1–6)                |
| 1 previous regimen                                               | 3                      |
| 2 previous regimens                                              | 2                      |
| 3–4 previous regimens                                            | 15                     |
| 5–6 previous regimens                                            | 5                      |
| <b>ECOG status</b>                                               |                        |
| ECOG 0                                                           | 9                      |
| ECOG 1                                                           | 16                     |
| <b>Baseline CEA</b>                                              |                        |
| Median                                                           | 107 ng/ml (5.7–10,982) |
| Patients with a CEA <20ng/ml                                     | 6                      |
| Patients with a CEA 20–100 ng/ml                                 | 5                      |
| Patients with a CEA 101–1,000 ng/ml                              | 8                      |
| Patients with a CEA >1,000ng/ml                                  | 6                      |
| <b>Patients enrolled at each dose level</b>                      |                        |
| 4 yeast units (YU)                                               | 4                      |
| 16 yeast units (YU)                                              | 3                      |
| 40 yeast units (YU)                                              | 18                     |
